# Supplementary figures and images for: Emulsion Properties during Microencapsulation of Cannabis Oil Based on Protein and Sucrose Esters as Emulsifiers: Stability and Rheological Behavior
Source: MDPI journal article supplement (doi:10.3390/foods11233923), 2022-12-05

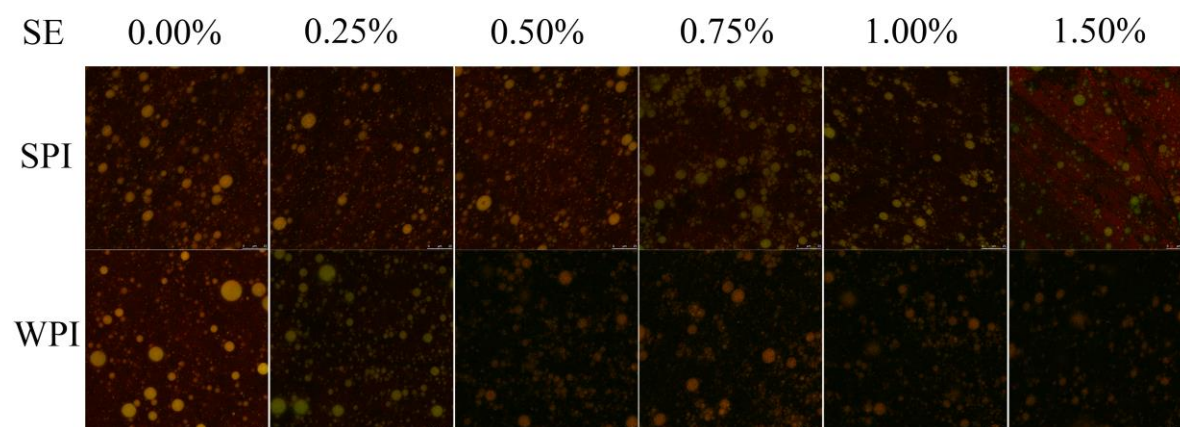

**Figure S1.** Microstructure of emulsion at different concentrations of SE (0.00–1.50%).

Supplement: s1 [file s1]
